# Supplementary material
Source: PubMed Central journal article supplement (PMC8919317)
Supplement: sj-pdf-1-ebm-10.1177_15353702211056866.pdf [file sj-pdf-1-ebm-10.1177_15353702211056866.pdf]

## Olfactory bulbs

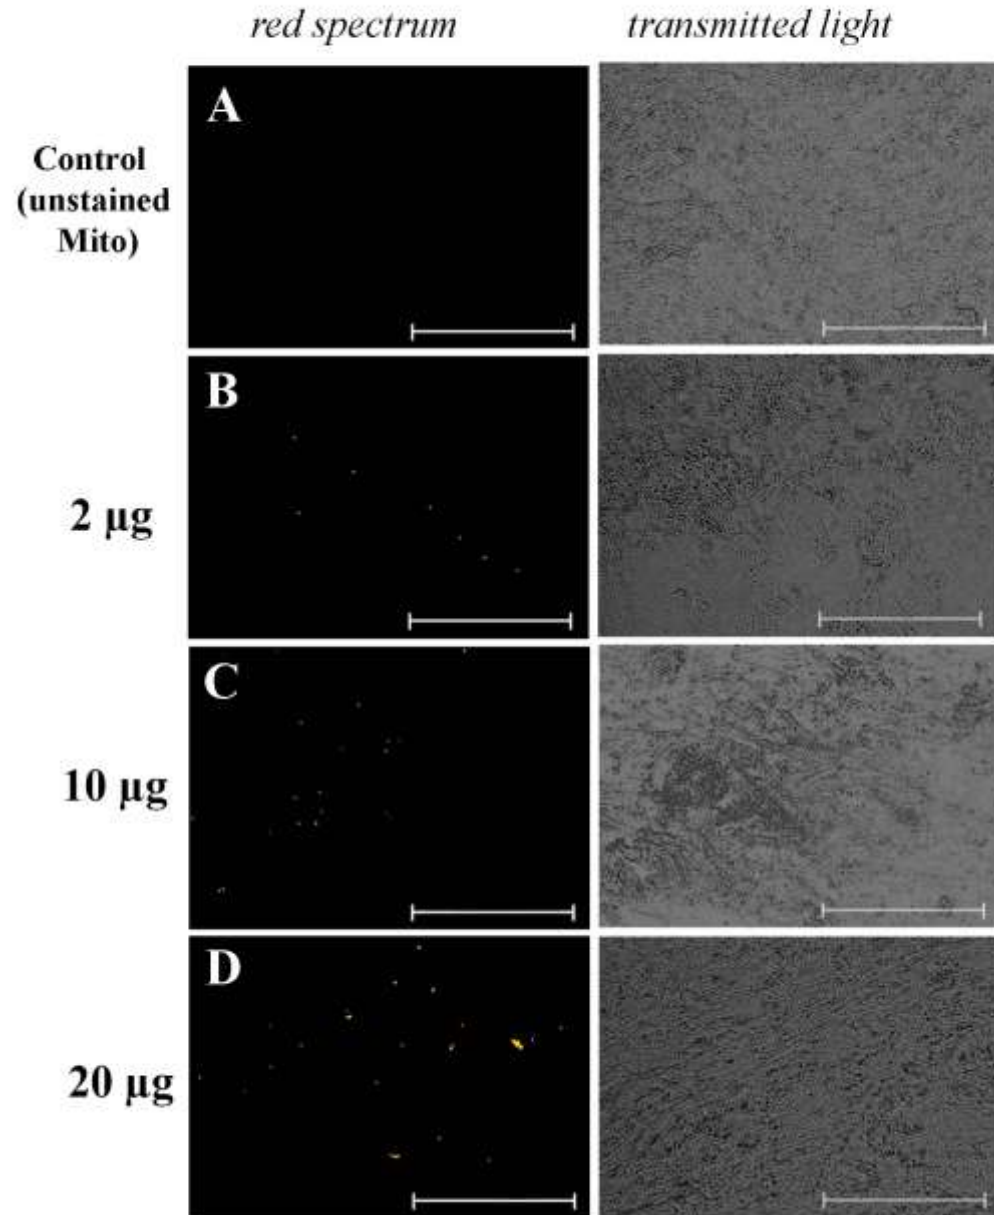

**FIGURE S1.** Micrographs of cytological smears of the olfactory bulbs of control NMRI mice, which were injected with solutions with unstained mitochondria at a dose of 10  $\mu\text{g}$  per mouse (negative control) (**A**) and MTR-stained mitochondria at doses of 2  $\mu\text{g}$  (**B**), 10  $\mu\text{g}$  (**C**) and 20  $\mu\text{g}$  (**D**) per mouse. Representative images in the red spectral region (left panel) and in transmitted light (right panel) are presented ( $n = 3$ ). The scale bar: 50  $\mu\text{m}$ .
